# Supplementary material
Source: publisher figshare collection journal article supplement (https://sage.figshare.com/ndownloader/files/20293620)

Supplementary figure: Flow chart of participant recruitment

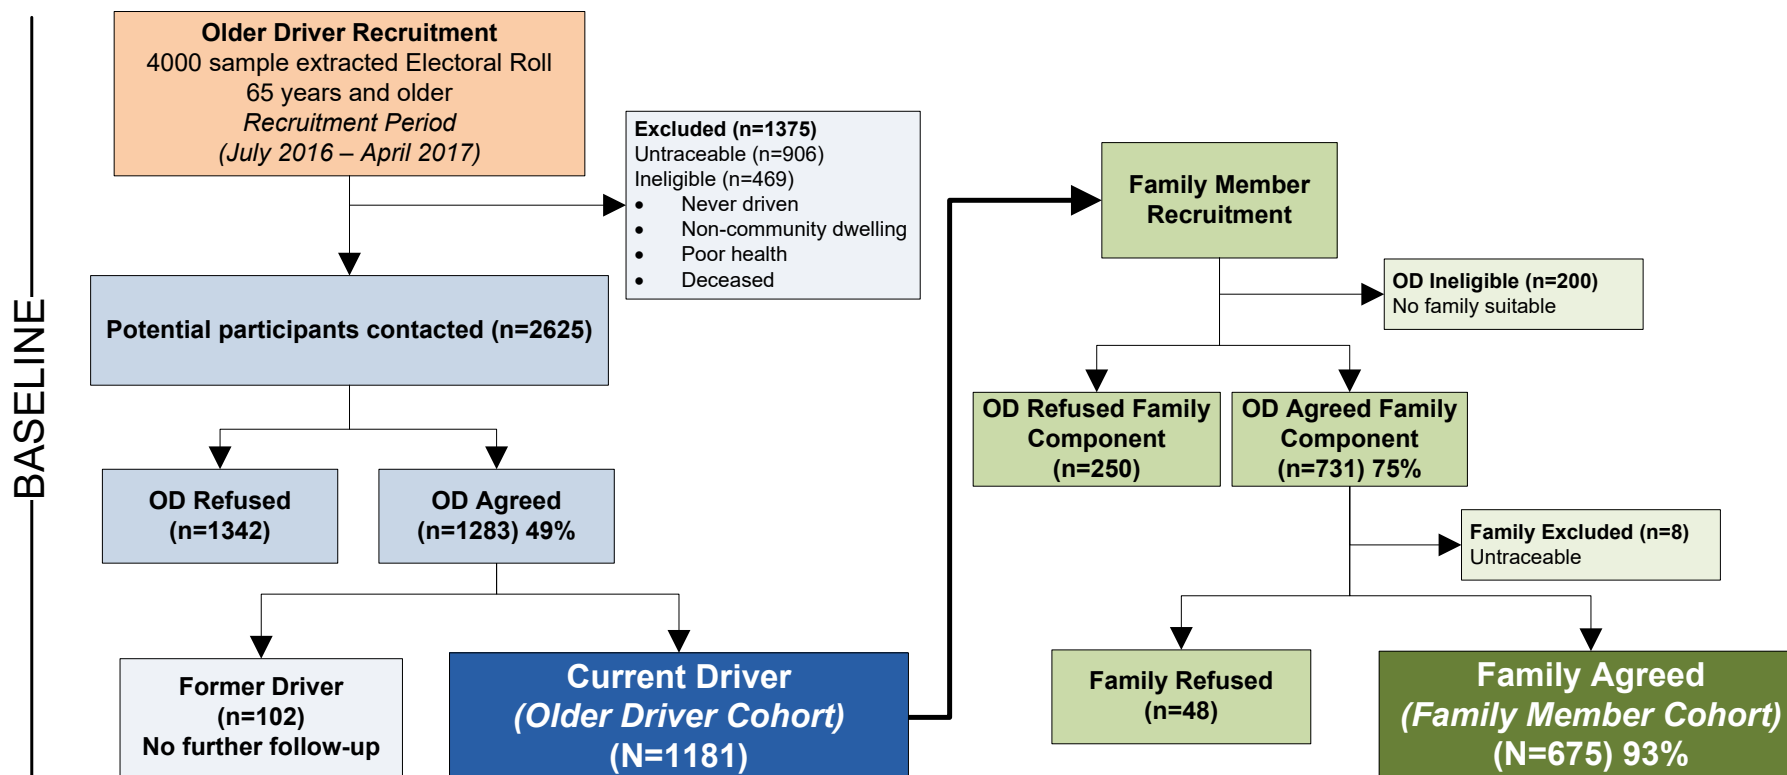

Supplement: Supplementary file 1 [file 20293620]
